# Supplementary material for: Gold nanoparticle decorated dithiocarbamate modified natural boehmite as a catalyst for the synthesis of biologically essential propargylamines
Source: PubMed Central journal article supplement (PMC9638948; doi:10.1039/d2ra03725d), 2022-11-07
Supplement: RA-012-D2RA03725D-s001.pdf [file RA-012-D2RA03725D-s001.pdf]

## Electronic Supporting information

### Gold nanoparticle decorated dithiocarbamate modified natural boehmite as a catalyst for the synthesis of biologically essential propargylamines

Elham Zarenezhad,<sup>a</sup> Reza Taghavi,<sup>b</sup> Parisa Kamrani<sup>b</sup>, Sadegh Rostamnia<sup>b,\*</sup>

<sup>a</sup> Noncommunicable Diseases Research Center, School of Medicine, Fasa University of Medical Sciences, Fasa, Iran. Email: el.zarenezhad@fums.ac.ir

<sup>b</sup> Organic and Nano Group (ONG), Department of Chemistry, Iran University of Science and Technology (IUST), PO Box 16846-13114, Tehran, Iran. Email: rostamnia@iust.ac.ir

**1-(1,3-diphenylprop-2-yn-1-yl)piperidine:** <sup>1</sup>H NMR (CDCl<sub>3</sub>, 500 MHz):  $\delta_{\text{H}}$  (ppm) 1.46 (s, 3H, NCH<sub>2</sub>CH<sub>2</sub>CH<sub>2</sub>), 1.60-1.66 (m, 6H, NCH<sub>2</sub>CH<sub>2</sub>CH<sub>2</sub>), 2.59 (s, 4H, NCH<sub>2</sub>CH<sub>2</sub>CH<sub>2</sub>), 4.83 (s, 1H of NCH), 7.32-7.40 (m, 6H of Ar), 7.53-7.55 (m, 2H of Ar), 7.65 (d, <sup>3</sup>J<sub>HH</sub> = 7Hz, 2H).

**4-(1,3-diphenylprop-2-yn-1-yl)morpholine:** <sup>1</sup>H NMR (CDCl<sub>3</sub>, 500 MHz):  $\delta_{\text{H}}$  (ppm) 2.66 (s, 2H, NCH<sub>2</sub>CH<sub>2</sub>O), 3.76 (t, <sup>3</sup>J<sub>HH</sub> = 5.5 Hz, 4H, NCH<sub>2</sub>CH<sub>2</sub>O), 4.82 (s, 1H of NCH), 7.33-7.41 (m, 6H of Ar), 7.53-7.55 (m, 2H of Ar), 7.64 (d <sup>3</sup>J<sub>HH</sub> = 7.5 Hz, 2H). <sup>13</sup>C NMR (125 MHz, CDCl<sub>3</sub>):  $\delta_{\text{C}}$  (ppm) 62.03 (NCH), 67.17 (NCH<sub>2</sub>CH<sub>2</sub>O), 85.03 (Ph-C≡C), 88.48 (HCN-C≡C), 122.97, 127.78, 128.23, 128.31, 128.59, 131.81, 137.79.

**4-(3-phenyl-1-(p-tolyl)prop-2-yn-1-yl)morpholine:** <sup>1</sup>H NMR (CDCl<sub>3</sub>, 500 MHz):  $\delta_{\text{H}}$  (ppm) 2.66 (s, 3H of Me), 2.71-2.62 (m, 4H, NCH<sub>2</sub>CH<sub>2</sub>O), 3.80-3.71 (m, 4H, NCH<sub>2</sub>CH<sub>2</sub>O), 4.87 (s, 1H of NCH), 7.22-7.19 (m, 2H of Ar), 7.36-7.33 (m, 3H of Ar). <sup>13</sup>C NMR (125 MHz, CDCl<sub>3</sub>):  $\delta_{\text{C}}$  (ppm)

31.7 (CH<sub>3</sub>), 50.7 (NCH<sub>2</sub>CH<sub>2</sub>O), 61.7 (NCH), 67.9 (NCH<sub>2</sub>CH<sub>2</sub>O), 85.3 (Ph-C≡C), 88.5 (HCN-C≡C), 123.2, 128.3, 128.4, 128.6, 129.1, 131.7, 135.6, 137.6.

**1-(1-(2-chlorophenyl)-3-phenylprop-2-yn-1-yl)piperidine:** <sup>1</sup>H NMR (CDCl<sub>3</sub>, 500 MHz): δ<sub>H</sub> (ppm) 1.44 (t, <sup>3</sup>J<sub>HH</sub> = 5.5 Hz, 2H, NCH<sub>2</sub>CH<sub>2</sub>CH<sub>2</sub>), 1.57-1.61 (m, 4H, NCH<sub>2</sub>CH<sub>2</sub>CH<sub>2</sub>), 2.63 (t, <sup>3</sup>J<sub>HH</sub> = 5.5 Hz, 4H, NCH<sub>2</sub>CH<sub>2</sub>CH<sub>2</sub>), 5.12 (s, 1H of NCH), 7.25-7.29 (m, 2H of Ar), 7.34 (t, <sup>3</sup>J<sub>HH</sub> = 6.5 Hz, 2H of Ar), 7.51-7.53 (m, 1H of Ar), 7.76-7.77 (m, 1H of Ar). <sup>13</sup>C NMR (125 MHz, CDCl<sub>3</sub>): δ<sub>c</sub> (ppm) 24.45 (NCH<sub>2</sub>CH<sub>2</sub>CH<sub>2</sub>), 26.14 (NCH<sub>2</sub>CH<sub>2</sub>CH<sub>2</sub>), 50.70 (NCH), 59.25 (NCH<sub>2</sub>CH<sub>2</sub>CH<sub>2</sub>), 85.81 (Ph-C≡C), 87.63 (HCN-C≡C), 123.17, 126.17, 128.13, 128.27, 128.76.

**1-(1-(2-chlorophenyl)-3-phenylprop-2-ynyl)morpholine:** <sup>1</sup>H NMR (CDCl<sub>3</sub>, 500 MHz): δ<sub>H</sub> (ppm) 2.69 (t, <sup>3</sup>J<sub>HH</sub> = 4.5 Hz, 4H, NCH<sub>2</sub>CH<sub>2</sub>O), 3.68-3.77 (m, 4H, NCH<sub>2</sub>CH<sub>2</sub>O), 4.95 (s, 1H of NCH), 7.29-7.36 (m, 5H of Ar), 7.42-7.44 (m, 1H of Ar), 7.51-7.53 (m, 2H of Ar), 7.76 (t, <sup>3</sup>J<sub>HH</sub> = 2.5 Hz, 1H of Ar).
